# Supplementary material for: Stretchable and Hydrophobic Electrochromic Devices Using Wrinkled Graphene and PEDOT:PSS
Source: Hindawi journal article supplement (doi:10.1155/2018/3230293), 2018-01-01
Supplement: f1 [file 3230293.f1.docx]

**Supporting Information for**

**Stretchable and Hydrophobic Electrochromic Devices Using Wrinkled Graphene and PEDOT:PSS**

Srinivasa Kartik Nemani†, Dayong Chen‡, Marwan H Mohamed†, Hossein Sojoudi*,†

†Department of Mechanical, Industrial and Manufacturing Engineering, University of Toledo, Ohio 43606, United States

‡Department of Mechanical and Aerospace Engineering, University of California, Los Angeles, Los Angeles, California 90095, United States

**Figure S1.**

**
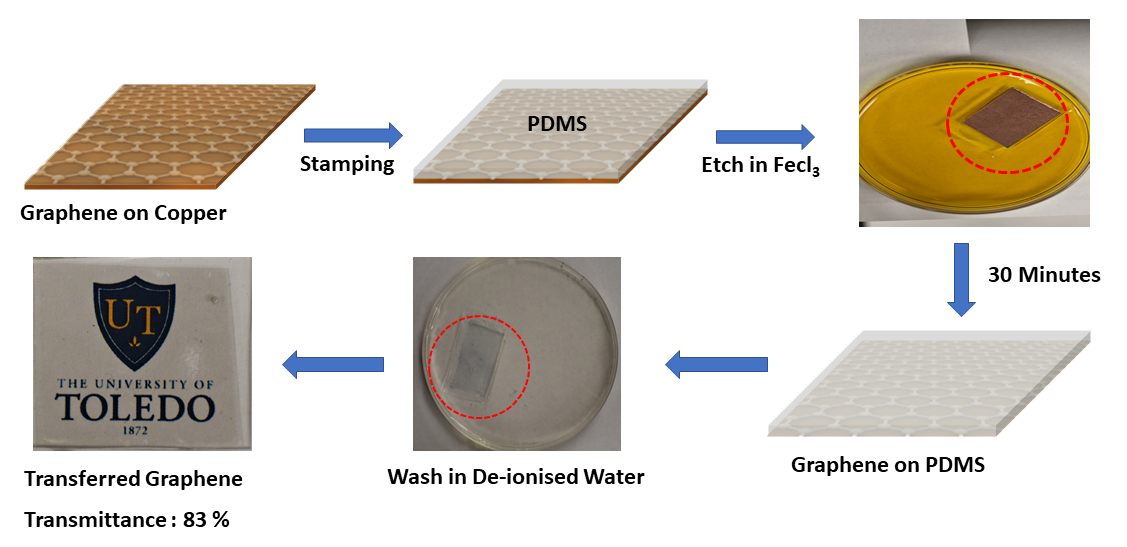
**

**Figure S1:** Schematic diagram of the graphene film transfer from the copper substrate to PDMS using stamping technique.

**Figure S2.**

**
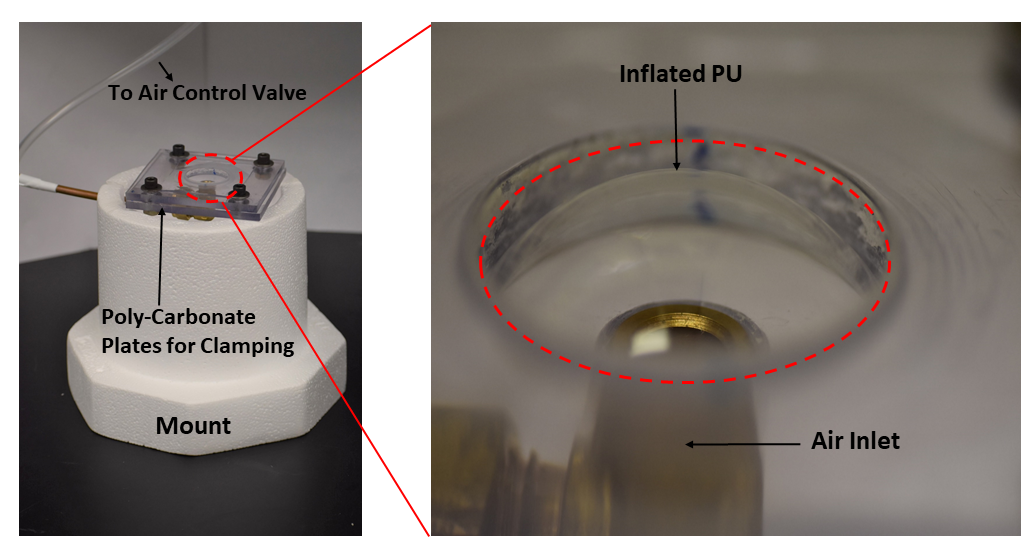
**

**Figure S2:** Setup for inflating the polyurethane/ionic liquid (PU/IL) layer by applying radial pre-strain via air supply. Graphene on PDMS was stamped on the inflated PU/IL; controlled wrinkles were obtained in graphene upon gradual deflation of the PU/IL layer.

**Figure S3.**

**
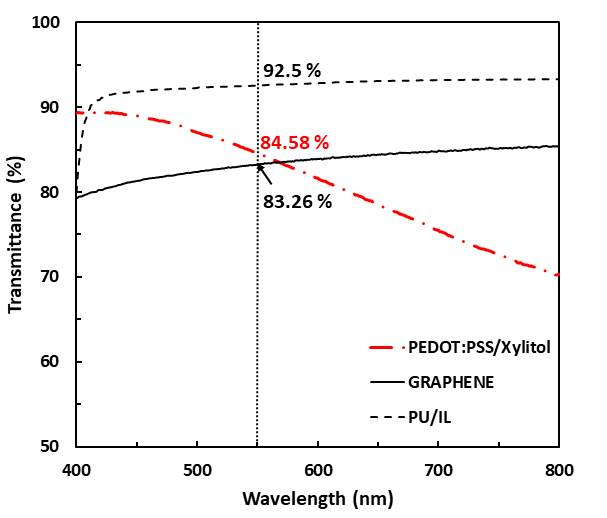
**

**Figure S3:** Transmittance plots for multilayer (6-8 layers) graphene, PEDOT:PSS/Xylitol, and Polyurethane/IL gel.

**Figure S4.**


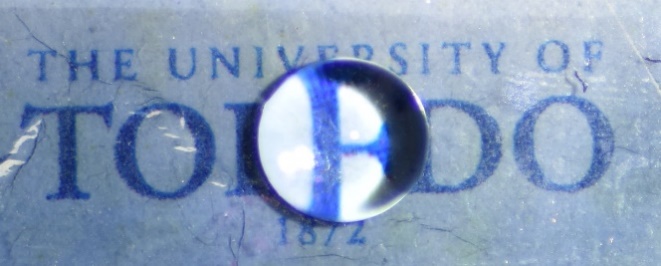

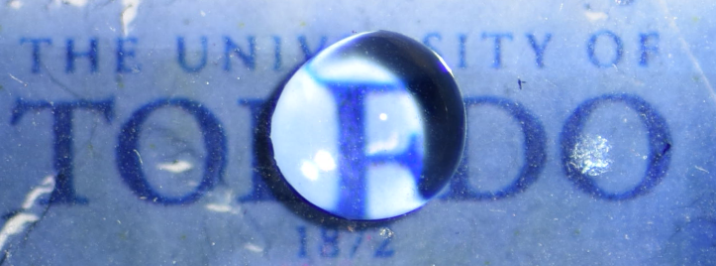


**Oxidized (Bleached) State Reduced (Blue) State**

**Figure S4:** Additional images of water droplet (3-4 µl) on the electrochromic device (ECD) in oxidized (bleached) and reduced (blue) states, exhibiting hydrophobic nature.
